# Supplementary material for: Cellular fate and performance of group IV metal organic framework radioenhancers
Source: Royal Society of Chemistry journal article supplement (doi:10.1039/d2bm00973k), 2022-01-01
Supplement: d2bm00973k1.pdf [file d2bm00973k1.pdf]

## Supporting Information

### Cellular Fate and Performance of Group IV Metal Organic Framework Radioenhancers

Anna Lena Neuer<sup>a,b</sup>, Alexander Jessernig<sup>a,b</sup>, Lukas R.H. Gerken<sup>a,b</sup>, Alexander Gogos<sup>a,b</sup>, Fabian H.L. Starsich<sup>a,b</sup>, Alexandre H.C. Anthis<sup>a,b</sup>, and Inge K. Herrmann<sup>a,b\*</sup>

<sup>a</sup>Laboratory for Particles-Biology Interactions, Department of Materials Meet Life, Swiss Federal Laboratories for Materials Science and Technology (Empa), Lerchenfeldstrasse 5, 9014 St. Gallen, Switzerland.

<sup>b</sup>Nanoparticle Systems Engineering Laboratory, Institute of Process Engineering, Department of Mechanical and Process Engineering, ETH Zurich, Sonneggstrasse 3, 8092 Zurich, Switzerland.

[\\*inge.herrmann@empa.ch](mailto:inge.herrmann@empa.ch); [ingeh@ethz.ch](mailto:ingeh@ethz.ch); +41 (0)58 765 7153

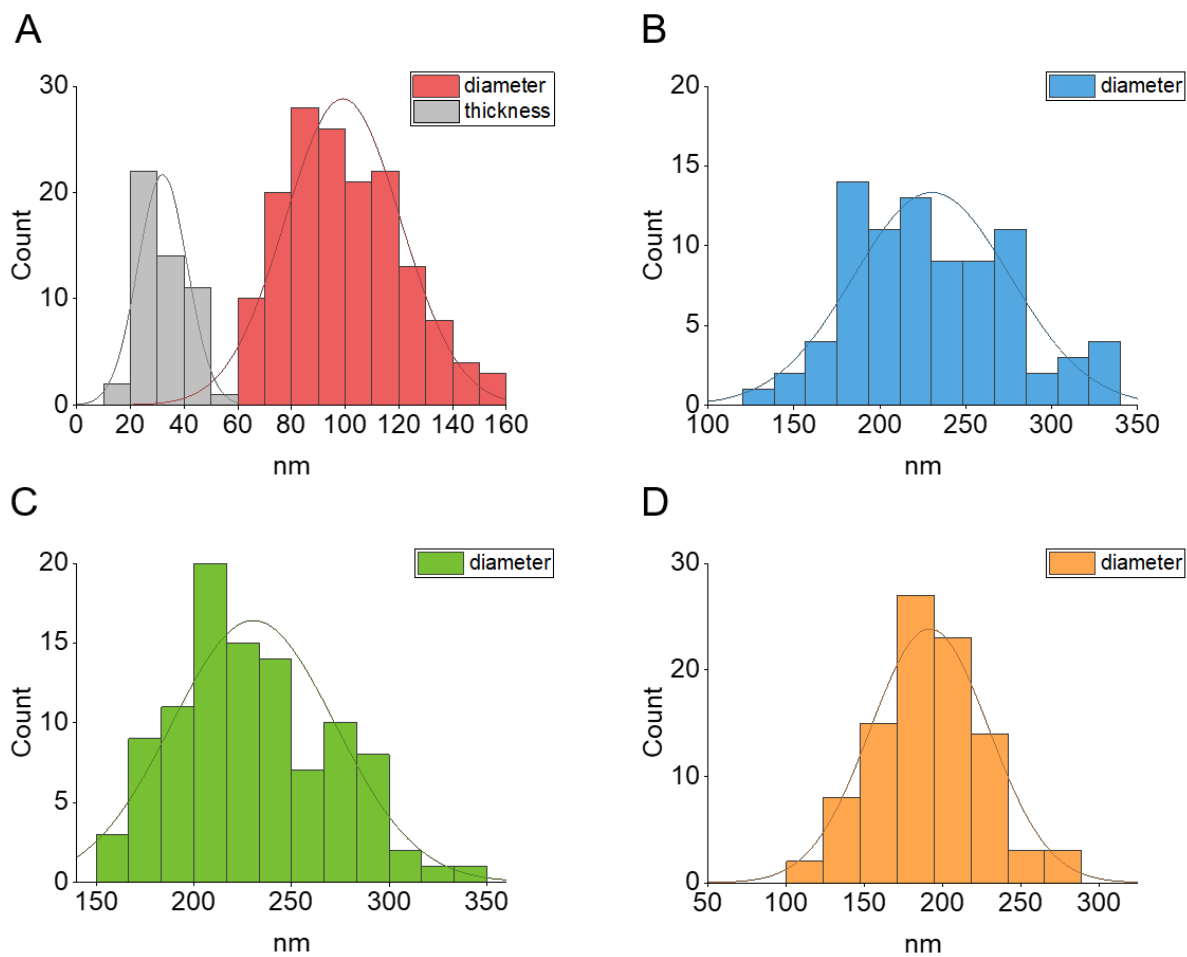

**Figure S1.** TEM size analysis of nanoMOFs (A) Hf-DBA, (B) Hf-TCPP, (C) Ti-MIL-125, and (D) Ti/Zr-PCN-415 plotted as histograms of at least 80 counts for diameter and 50 counts for disc thickness in case of Hf-DBA.

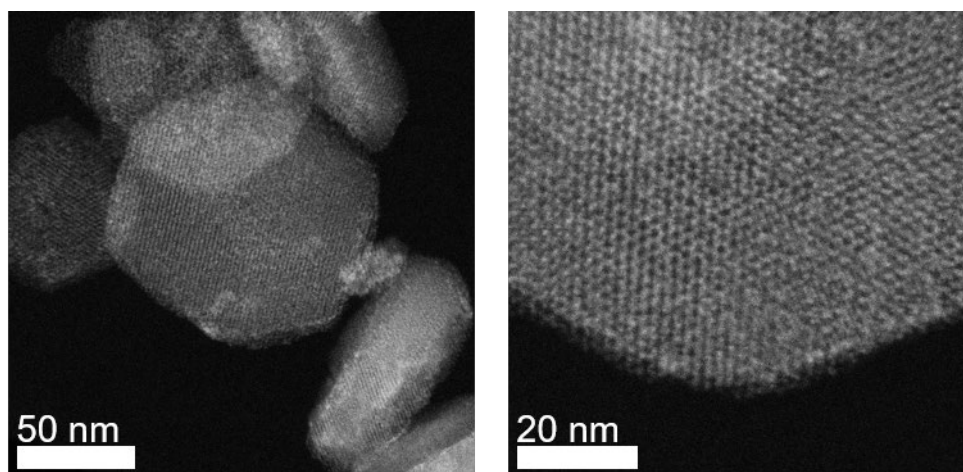

**Figure S2.** High resolution HAADF STEM image of as-prepared Hf-DBA nanoMOF.

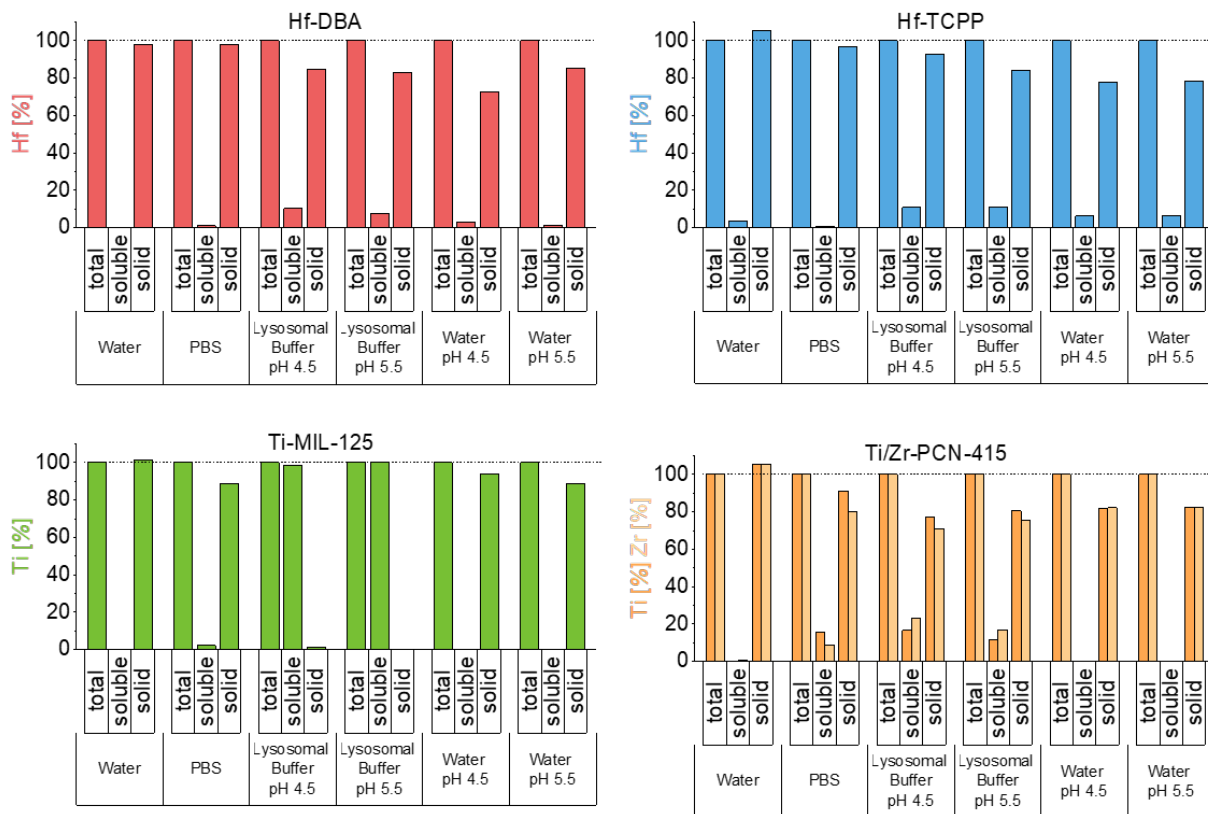

**Figure S3.** Stability of nanoMOFs (1 mg per mL incubation at 37°C for 24 hrs) in water, phosphate buffered saline (PBS), lysosomal buffer (pH 4.5 and 5.5) and HNO<sub>3</sub> acidified water (pH 4.5 and 5.5). Concentration of the corresponding metals Hf, Zr and Ti was analyzed by ICP-OES in the total fraction and the soluble and solid fractions (separated by high-speed centrifugation).

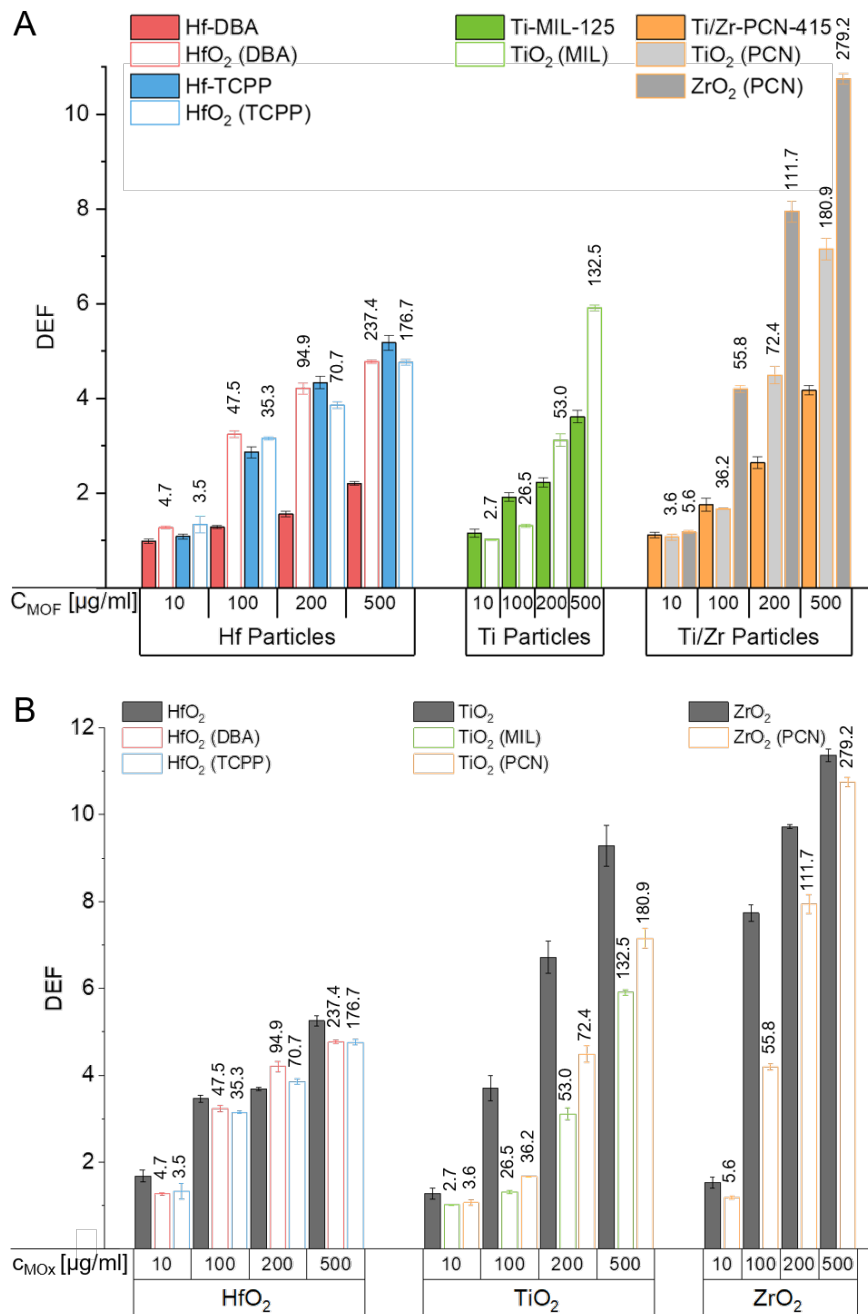

**Figure S4.** Dose enhancement factors (DEF) calculated based on reactive oxygen species generation for the different nanoMOFs as a (A) function of nanoMOF mass concentration and benchmarking against the corresponding equi-molar dosed metal oxides in buffer (cell-free) conditions. Dose enhancement factors for (B) absolute masses of HfO<sub>2</sub>, TiO<sub>2</sub> and ZrO<sub>2</sub> against the corresponding equi-molar dosed metal oxides in buffer conditions. Absolute mass of equi-molar dosed oxide nanoparticle given in  $\mu\text{g}$  per mL above the respective bars.

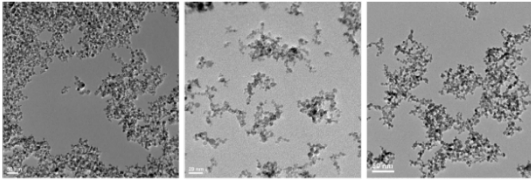

| Nanoparticle            | TiO <sub>2</sub> | ZrO <sub>2</sub> | HfO <sub>2</sub> |
|-------------------------|------------------|------------------|------------------|
| SSA [m <sup>2</sup> /g] | 235              | 161              | 89               |
| d <sub>TEM</sub> [nm]   | 5                | 5                | 5                |
| D <sub>DLS</sub> [nm]   | 142              | 158              | 158              |

**Figure S5.** Oxide nanoparticle characterization data for the flame spray pyrolysis synthesized metal oxide nanoparticle batches from Gerken et al.<sup>[42]</sup> with specific surface area (SSA) measurement and TEM and DLS size analysis.

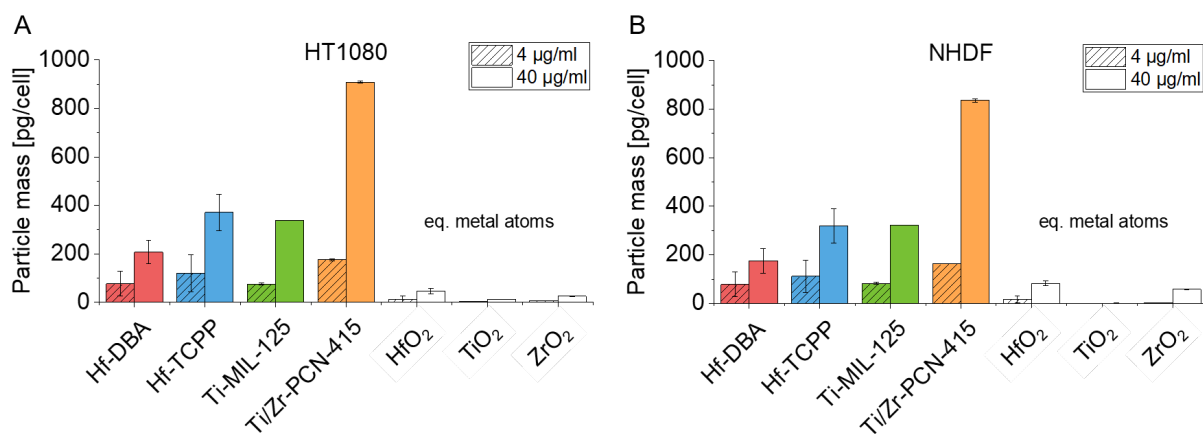

**Figure S6.** Particle mass in HT1080 (A) and NHDF cells (B) after 24h cellular exposure to nanoMOFs and corresponding oxide nanoparticles at different sub-toxic concentrations analyzed with ICP-OES.

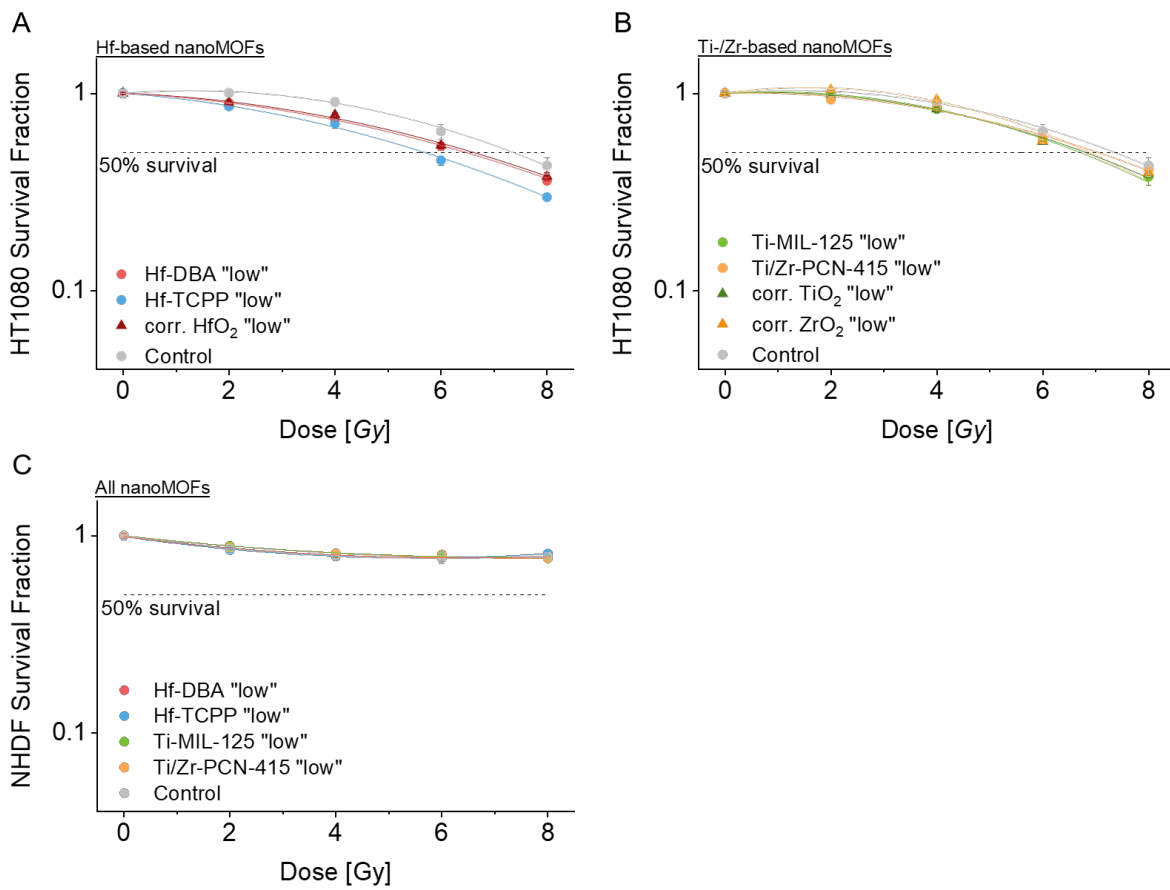

**Figure S7.** Radioenhancement effects in HT1080 for (A) Hf-based nanoMOFs with equi-dosed HfO<sub>2</sub> and (B) Ti-/Zr-based nanoMOFs with equi-dosed TiO<sub>2</sub> and ZrO<sub>2</sub>, (equimolar dose of oxide nanoparticles). Radioenhancement effects in NHDF cells (C) for all nanoMOFs. Treatment doses at 4 μg per mL.

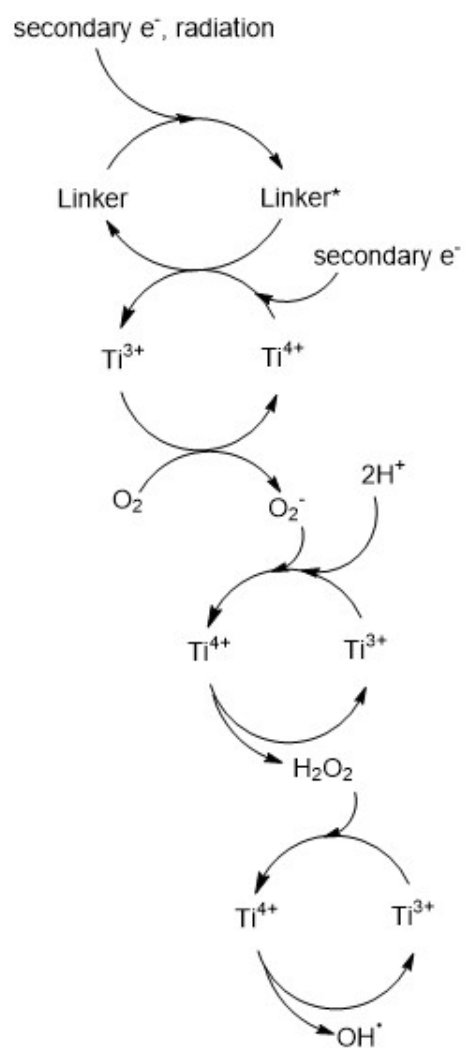

**Figure S8.** Possible catalytic cycle for a linker-mediated metal reduction. Adapted in parts from Liu et al.<sup>[45]</sup>

**Table S1.** Dynamic lights scattering data for nanoMOFs dispersed in water ( $d_{H_2O}$ ), ethanol ( $d_{EtOH}$ ) and cell culture media ( $d_{Medium}$ ).

| MOF           | $d_{H_2O}$             | $PDI_{H_2O}$         | $d_{EtOH}$              | $PDI_{EtOH}$         | $d_{Medium}$          | $PDI_{Medium}$       |
|---------------|------------------------|----------------------|-------------------------|----------------------|-----------------------|----------------------|
| Hf-DBA        | 103.4 ( $\pm 28$ ) nm  | 0.166 ( $\pm 0.01$ ) | 147.0 ( $\pm 17.7$ ) nm | 0.204 ( $\pm 0.03$ ) | 623.2 ( $\pm 70$ ) nm | 0.248 ( $\pm 0.02$ ) |
| Hf-TCPP       | 228.3 ( $\pm 34$ ) nm  | 0.164 ( $\pm 0.03$ ) | 229.4 ( $\pm 51.0$ ) nm | 0.234 ( $\pm 0.03$ ) | 360.8 ( $\pm 98$ ) nm | 0.181 ( $\pm 0.01$ ) |
| Ti-MIL-125    | 824.7 ( $\pm 132$ ) nm | 0.252 ( $\pm 0.04$ ) | 217.3 ( $\pm 13.3$ ) nm | 0.175 ( $\pm 0.01$ ) | 707.2 ( $\pm 92$ ) nm | 0.281 ( $\pm 0.01$ ) |
| Ti/Zr-PCN-415 | 779.3 ( $\pm 102$ ) nm | 0.181 ( $\pm 0.06$ ) | 247.1 ( $\pm 48.5$ ) nm | 0.205 ( $\pm 0.03$ ) | 506.4 ( $\pm 19$ ) nm | 0.307 ( $\pm 0.05$ ) |

**Table S2.** Inductively coupled plasma spectroscopy (ICP-OES) analysis of nanoMOFs.

| MOF           | Metal per mass [%]         | Theoretical total metal per mass [%] | Metal per mass [mol/mg] |
|---------------|----------------------------|--------------------------------------|-------------------------|
| Hf-DBA        | 36.90                      | 38.89                                | $2.07 \times 10^{-6}$   |
| Hf-TCPP       | 28.19                      | 24.53                                | $1.58 \times 10^{-6}$   |
| Ti-MIL-125    | 17.72                      | 23.16                                | $3.70 \times 10^{-6}$   |
| Ti/Zr-PCN-415 | 21.85 (Ti: 14.73 Zr: 7.11) | 19.18                                | $3.86 \times 10^{-6}$   |

**Table S3.** Carbon hydrogen nitrogen (CHN) analysis of nanoMOFs including recovery [%] compared to theoretical values using metal data from ICP-OES (Table S2).

| MOF           | theoretical Formula               | % calculated |      |      |       |       | % measured CHN-Analyzer |      |      |
|---------------|-----------------------------------|--------------|------|------|-------|-------|-------------------------|------|------|
|               |                                   | C            | H    | N    | O     | Metal | C                       | H    | N    |
| Hf-DBA        | $C_{180}H_{149}N_9O_{58}Hf_{12}$  | 39.25        | 2.73 | 2.29 | 16.85 | 38.89 | 40.22                   | 3.58 | 2.26 |
| Hf-TCPP       | $C_{192}H_{124}N_{16}O_{40}Hf_6$  | 52.82        | 2.86 | 5.13 | 14.66 | 24.53 | 43.02                   | 3.56 | 4.28 |
| Ti-MIL-125    | $C_{48}H_{34}N_6O_{36}Ti_8$       | 34.86        | 2.07 | 5.08 | 34.83 | 23.16 | 31.74                   | 2.70 | 0.67 |
| Ti/Zr-PCN-415 | $C_{144}H_{96}O_{108}Ti_{10}Zr_4$ | 39.33        | 2.20 | 0.00 | 39.29 | 19.18 | 34.18                   | 5.03 | 5.18 |

  

|               | Theoretical ratio |       | measured ratio CHN-Analyzer |       | % recovery<br>$CHN_{CHN+ICP_{Metal}}+theoretical_o$ |
|---------------|-------------------|-------|-----------------------------|-------|-----------------------------------------------------|
|               | C/N               | C/H   | C/N                         | C/H   |                                                     |
| Hf-DBA        | 17.15             | 14.39 | 17.84                       | 11.23 | 99.80                                               |
| Hf-TCPP       | 10.29             | 18.45 | 10.05                       | 12.08 | 93.71                                               |
| Ti-MIL-125    | 6.86              | 16.82 | 6.60                        | 6.80  | 87.66                                               |
| Ti/Zr-PCN-415 | -                 | 17.87 | -                           | 11.74 | 105.51                                              |



**Table S4.** Dose enhancement factor (DEFs) at 8Gy radiation, dose modifying ratio (DMR) at 50% survival and the 50% lethal dose (LD) for all used nanoMOFs and concentrations with corresponding oxide nanoparticle in HT1080 cells.

|                                |                                           |                                          |                        |                                           |                                          |                                           |                                          |
|--------------------------------|-------------------------------------------|------------------------------------------|------------------------|-------------------------------------------|------------------------------------------|-------------------------------------------|------------------------------------------|
| HT1080 MOFs                    | Hf-DBA<br>40 µg per mL                    | Hf-DBA<br>4 µg per mL                    | Hf-TCPP<br>4 µg per mL | Ti-MIL-125<br>40 µg per mL                | Ti-MIL-125<br>4 µg per mL                | Ti/Zr-PCN-415<br>40 µg per mL             | Ti/Zr-PCN-415<br>4 µg per mL             |
| DEF <sub>8Gy</sub>             | 1.28                                      | 1.10                                     | 1.29                   | 3.88                                      | 1.09                                     | 2.30                                      | 1.03                                     |
| DMR <sub>50%</sub>             | 1.36                                      | 1.14                                     | 1.37                   | 3.84                                      | 0.96                                     | 2.20                                      | 0.91                                     |
| LD <sub>50</sub> <sup>a)</sup> | 5.40 Gy                                   | 6.48 Gy                                  | 5.38 Gy                | 1.67 Gy                                   | 6.71 Gy                                  | 2.91 Gy                                   | 7.05 Gy                                  |
| Oxide NP                       | corr. HfO <sub>2</sub> to<br>40 µg per mL | corr. HfO <sub>2</sub> to<br>4 µg per mL |                        | corr. TiO <sub>2</sub> to<br>40 µg per mL | corr. TiO <sub>2</sub> to<br>4 µg per mL | corr. ZrO <sub>2</sub> to<br>40 µg per mL | corr. ZrO <sub>2</sub> to<br>4 µg per mL |
| DEF <sub>8Gy</sub>             | 1.07                                      | 1.08                                     |                        | 1.34                                      | 1.07                                     | 1.08                                      | 1.08                                     |
| DMR <sub>50%</sub>             | 1.09                                      | 1.11                                     |                        | 1.19                                      | 0.94                                     | 0.93                                      | 0.93                                     |
| LD <sub>50</sub> *             | 6.75 Gy                                   | 6.62 Gy                                  |                        | 5.39 Gy                                   | 6.82 Gy                                  | 6.91 Gy                                   | 6.90 Gy                                  |

<sup>a)</sup>Control LD<sub>50</sub> 7.37 Gy
